# Supplementary material for: Single molecule-level detection and long read-based phasing of epigenetic variations in bacterial methylomes
Source: PubMed Central journal article supplement (PMC4490391; doi:10.1038/ncomms8438), 2015-06-15
Supplement: ncomms8438-s1.pdf [file ncomms8438-s1.pdf]

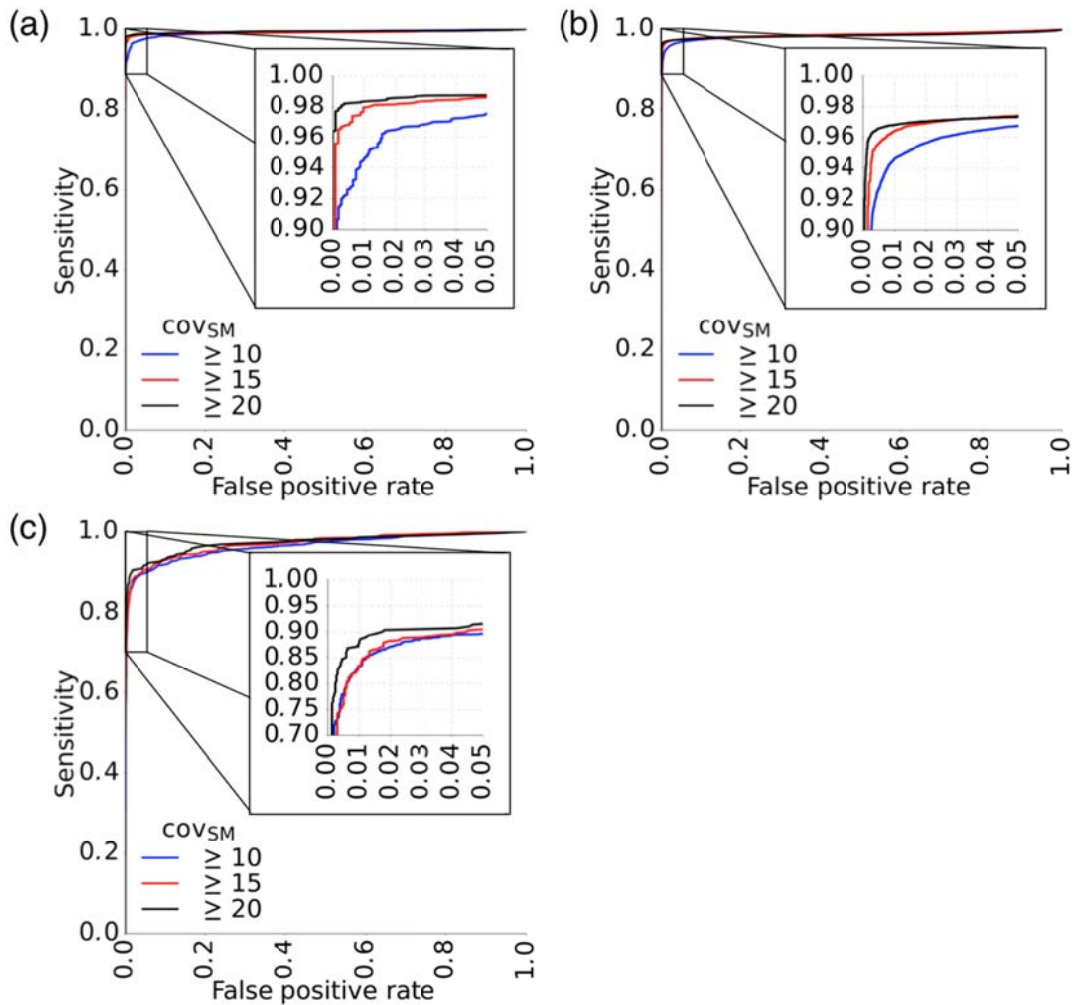

**Supplementary Figure 1:** Sensitivity and specificity of the  $SM_{SN}$  method for detecting DNA modifications using three thresholds for minimum single-molecule coverage ( $cov_{SM}$ ): **(a)** 6mA modifications in the 5'-ACCACC motif in *E. coli* C227, **(b)** 6mA modifications in the 5'-GATC motif in *E. coli* C227, and **(c)** 4mC modifications in the 5'-CGWCG motif in *H. pylori* J99.

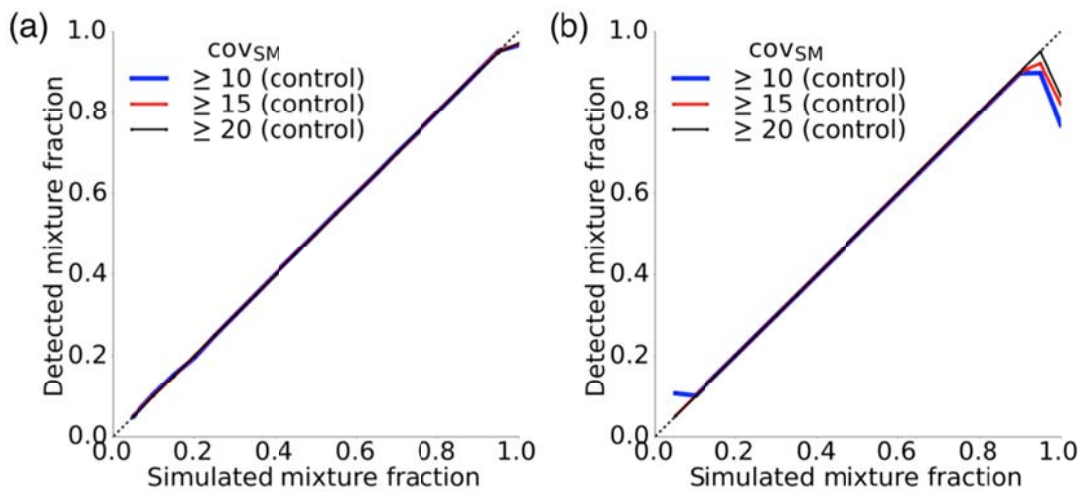

**Supplementary Figure 2:** Two alternative approaches for generating simulated modified and non-modified distributions used to test the ability of the  $SM_{SN}$  scores to estimate the size of the modified fraction. Instead of mixing varying proportions of WGA and native molecules, we instead **(a)** simulated two normal distributions centered around the mean  $SM_{SN}$  scores for modified ( $SM_{SN} = 2$ ) and non-modified ( $SM_{SN} = 0$ ) adenine residues and varied their relative proportions, and **(b)** exclusively used WGA molecules, but simulated the presence of a modification by adding 2 to the WGA  $SM_{SN}$  scores in a varying number of WGA molecules.

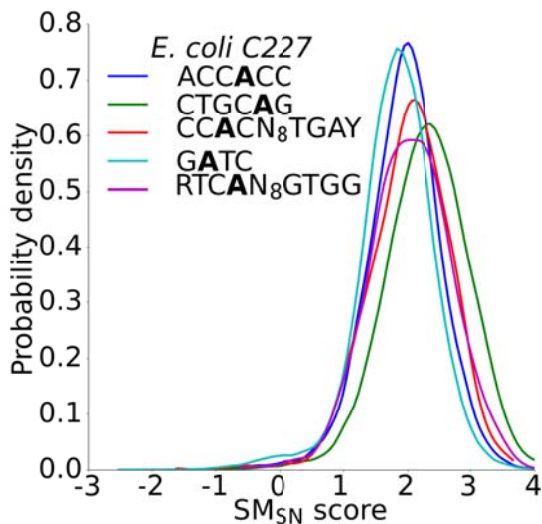

**Supplementary Figure 3:**  $SM_{SN}$  score distributions ( $cov_{SM} \geq 10$ ) for all five 6mA motifs in *E. coli* C227.

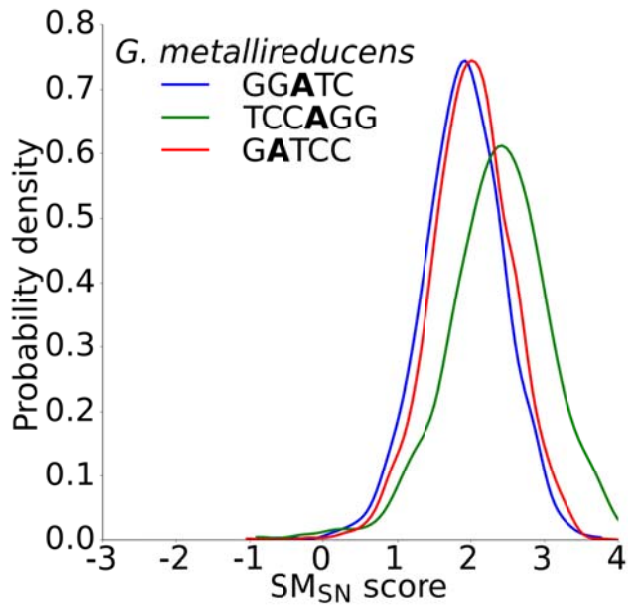

**Supplementary Figure 4:** SM<sub>SN</sub> score distributions ( $\text{cov}_{\text{SM}} \geq 10$ ) for all three 6mA motifs in *G. metallireducens*.

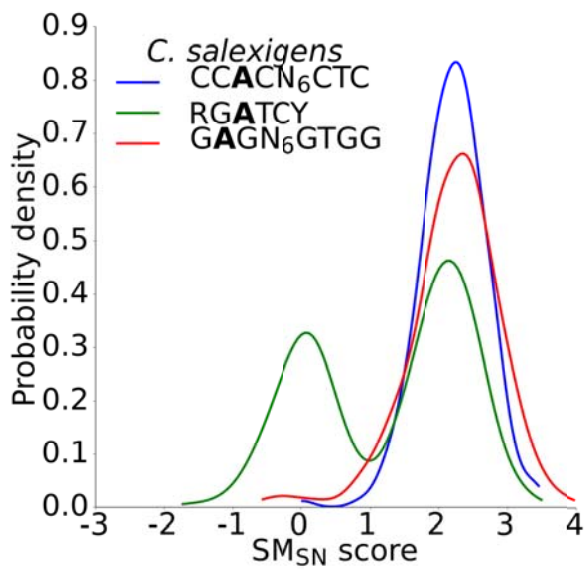

**Supplementary Figure 5:** SM<sub>SN</sub> score distributions ( $\text{cov}_{\text{SM}} \geq 10$ ) for all three 6mA motifs in *C. salexigens*.

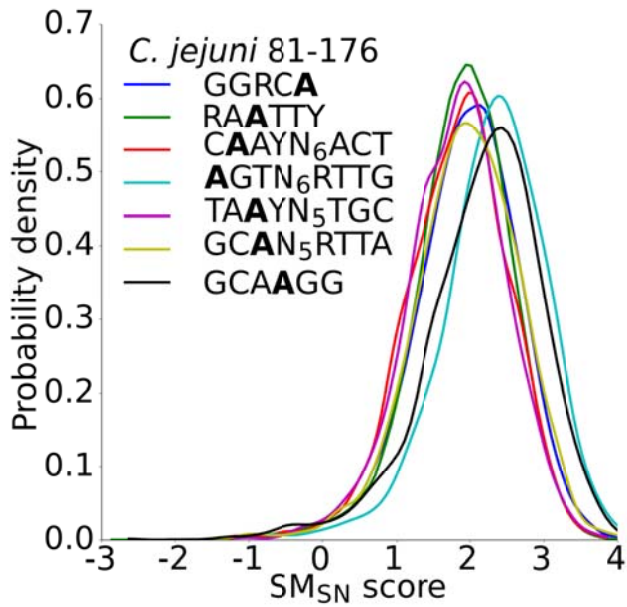

**Supplementary Figure 6:** SM<sub>SN</sub> score distributions ( $\text{cov}_{\text{SM}} \geq 5$ ) for all seven 6mA motifs in *C. jejuni* 81-176.

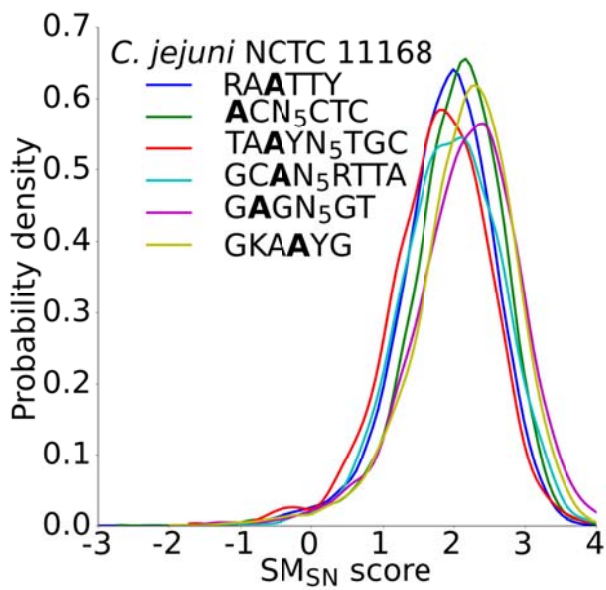

**Supplementary Figure 7:** SM<sub>SN</sub> score distributions ( $\text{cov}_{\text{SM}} \geq 5$ ) for all six 6mA motifs in *C. jejuni* NCTC 11168.

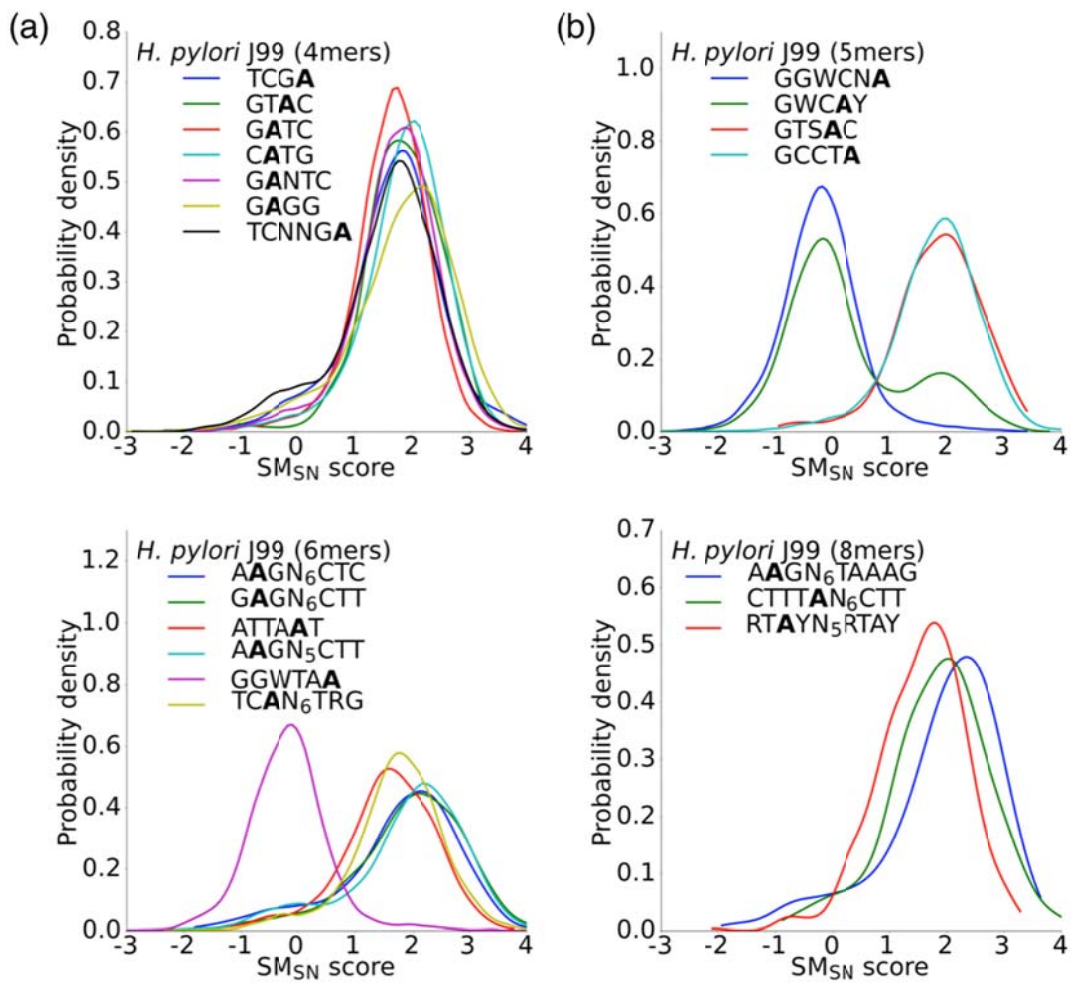

**Supplementary Figure 8:** SM<sub>SN</sub> score distributions ( $\text{cov}_{\text{SM}} \geq 5$ ) in *H. pylori* J99 for (a) all 4mer 6mA motifs, (b) all 5mer 6mA motifs, (c) all 6mer 6mA motifs, and (d) all 8mer 6mA motifs.

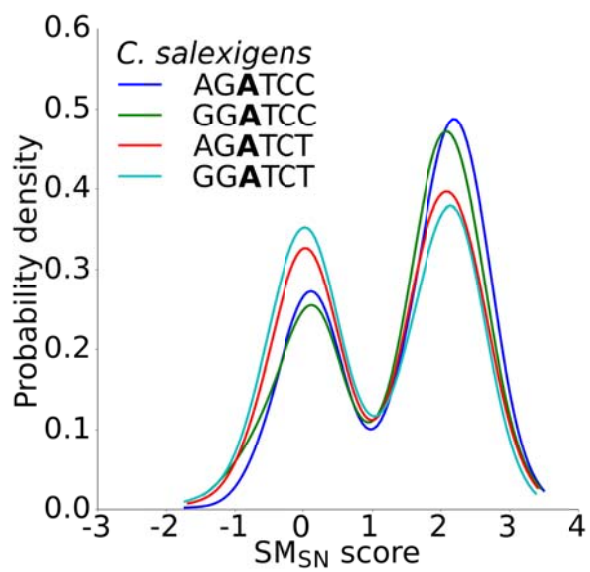

**Supplementary Figure 9:** The SM<sub>SN</sub> score distributions ( $\text{cov}_{\text{SM}} \geq 10$ ) for each specification of the degenerate 5'-RGATCY 6mA motif show similar levels of global heterogeneity.

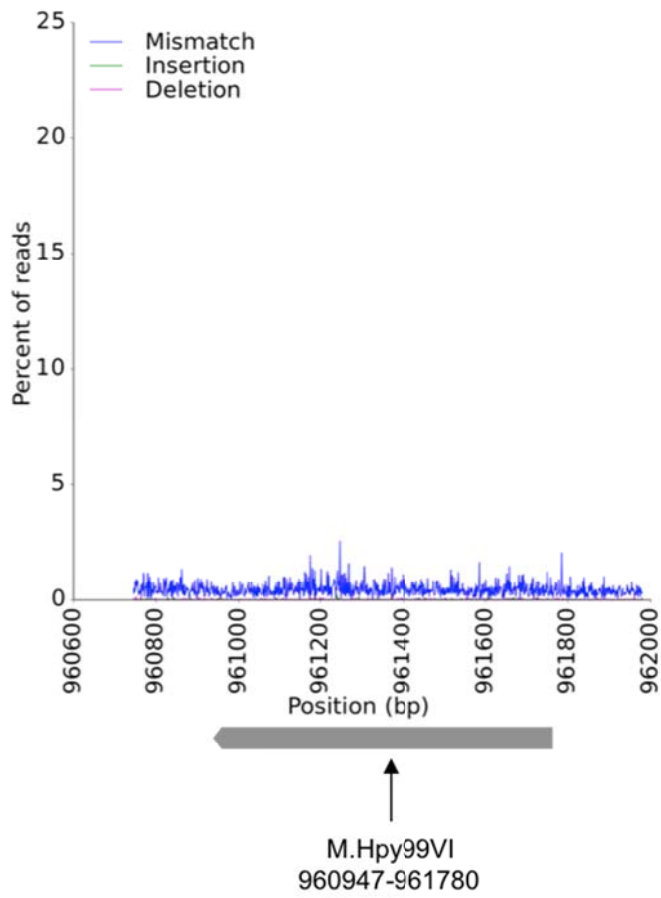

**Supplementary Figure 10:** Read-level MiSeq mismatch and insertion/deletion calls in the coding region ( $\pm 200$ bp) of the 5'-GATC-targeting *M.Hpy99VI* gene in *H. pylori* J99.

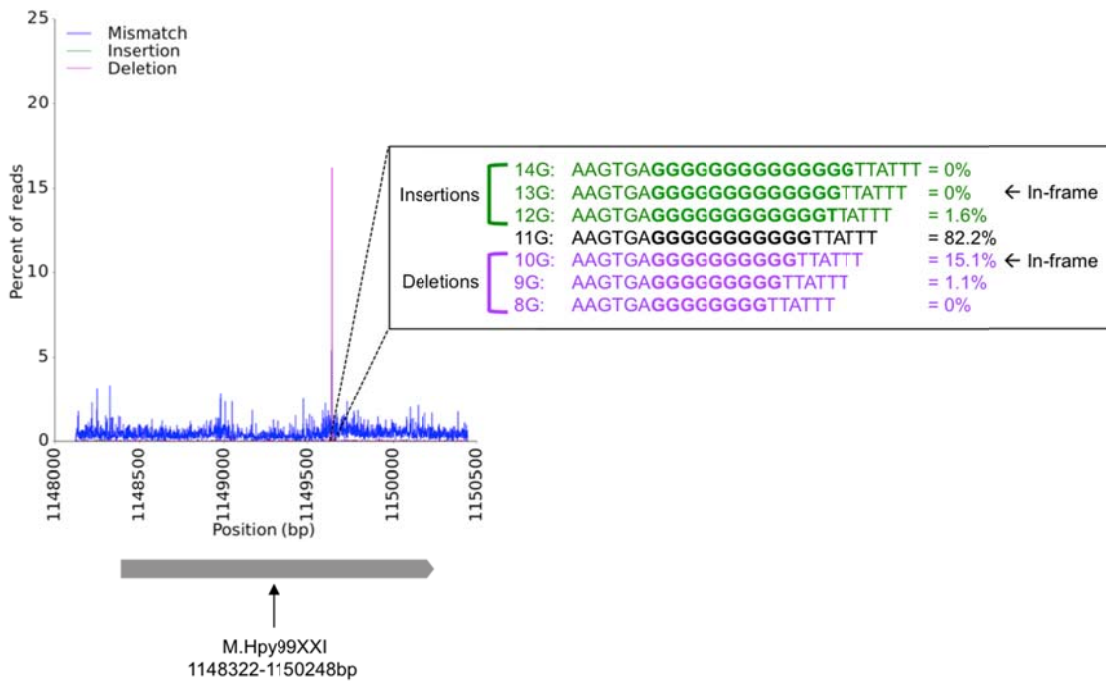

**Supplementary Figure 11:** Read-level MiSeq mismatch and insertion/deletion calls in the coding region (+/-200bp) of the 5'-GWCAY-targeting *M.Hpy99XXI* gene in *H. pylori* J99.

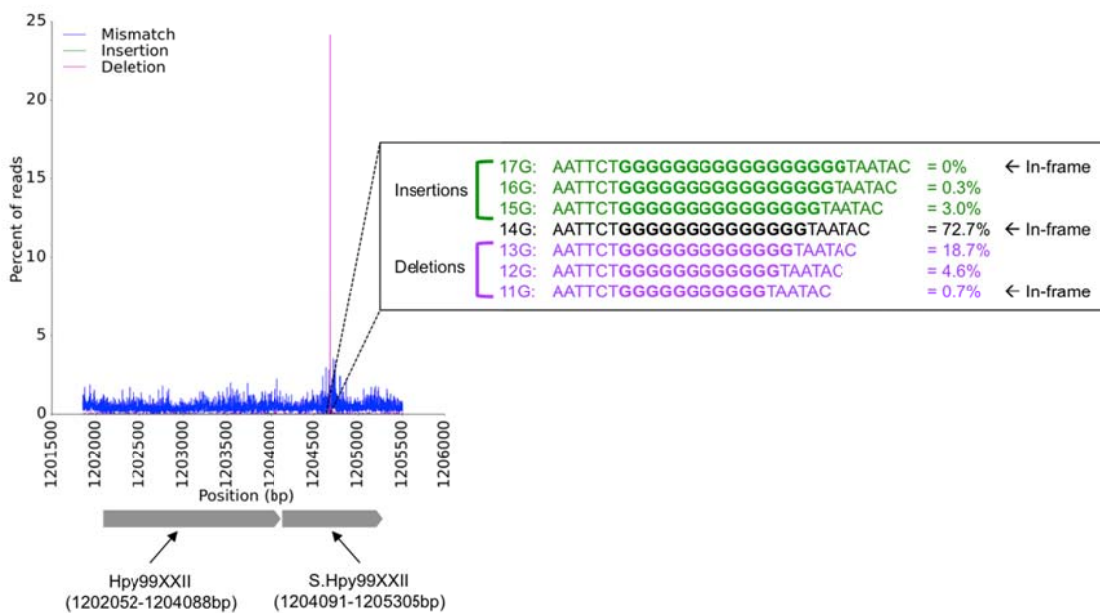

**Supplementary Figure 12:** Read-level MiSeq mismatch and insertion/deletion calls in the coding region (+/-200bp) of the 5'-TCAN<sub>6</sub>TRG/5'-CYAN<sub>6</sub>TGA-targeting *Hpy99XXII* and *S.Hpy99XXII* genes in *H. pylori* J99.



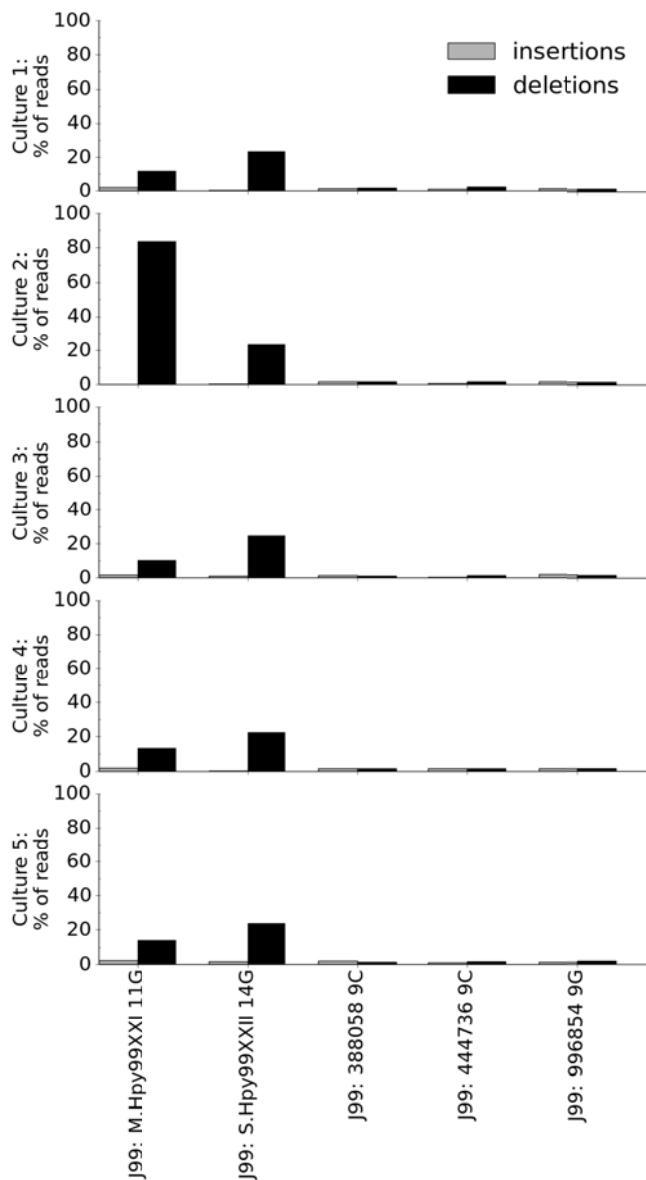

**Supplementary Figure 13:** Percentage of reads with insertion/deletion calls at multiple C/G homopolymer loci in five clonal cultures isolated from the original *H. pylori* J99 lab strain. The significant percentage of deletions in two specific poly-G regions within the coding sequences of *M.Hpy99XXI* and *S.Hpy99XXII* stand apart from the minimal length variation observed at three other 9C/G homopolymer loci in *H. pylori* J99. This suggests that the homopolymer length variation in *M.Hpy99XXI* and *S.Hpy99XXII* occurs even in clonal samples rapidly within 144 hours and is not the result of diverging, stable subpopulations within the original cell culture. One of the five colonies has a large percentage of deletions in *M.Hpy99XXI* (i.e. mostly 10G homopolymer rather than 11G), which suggests that this single colony is likely derived from a parent cell with a 10G homopolymer

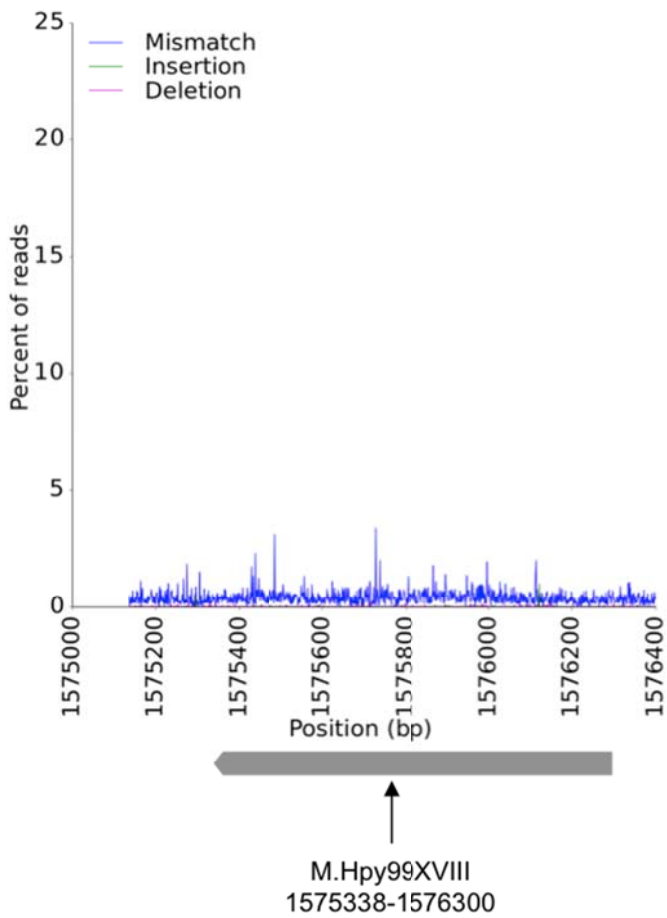

**Supplementary Figure 14:** Read-level MiSeq mismatch and insertion/deletion calls in the coding region ( $\pm 200$ bp) of the 5'-TCNNGA-targeting *M.Hpy99XVIII* gene in *H. pylori* J99.

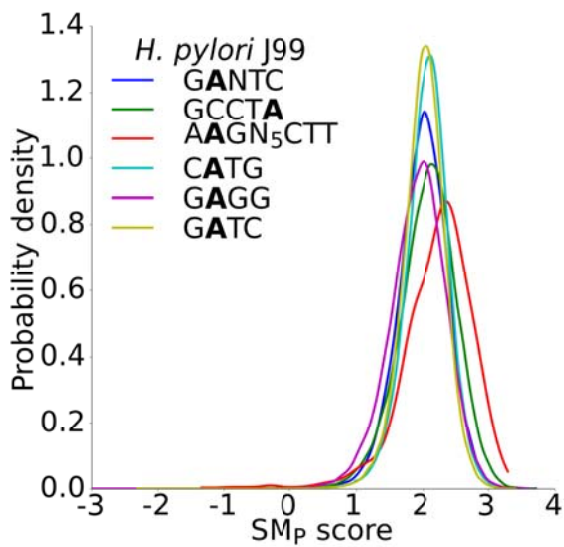

**Supplementary Figure 15:** SM<sub>P</sub> score distributions (at least 10 motif sites per molecule) for all 6mA motifs in *H. pylori* J99 (excluding 5'-GWCAY, 5'-TCAN<sub>6</sub>TRG, and 5'-TCNNGA) that contained at least ten distinct motif sites on at least 500 molecules.

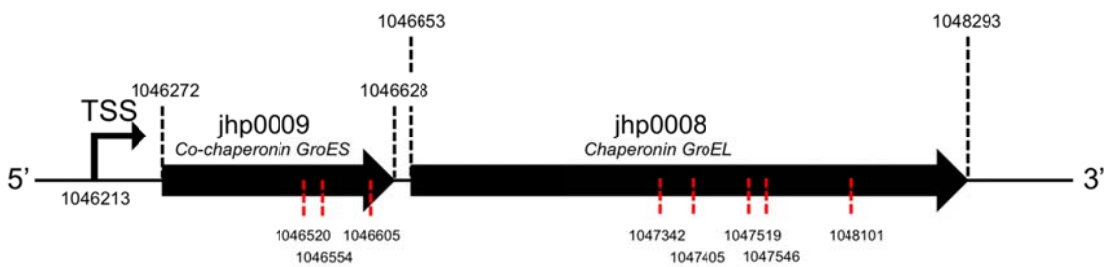

**Supplementary Figure 16:** Distribution of 5'-GWCAY motif sites in the two-gene operon encoding GroES and GroEL that are significantly up-regulated in HPXZ1401, from the left to the right (5' → 3').

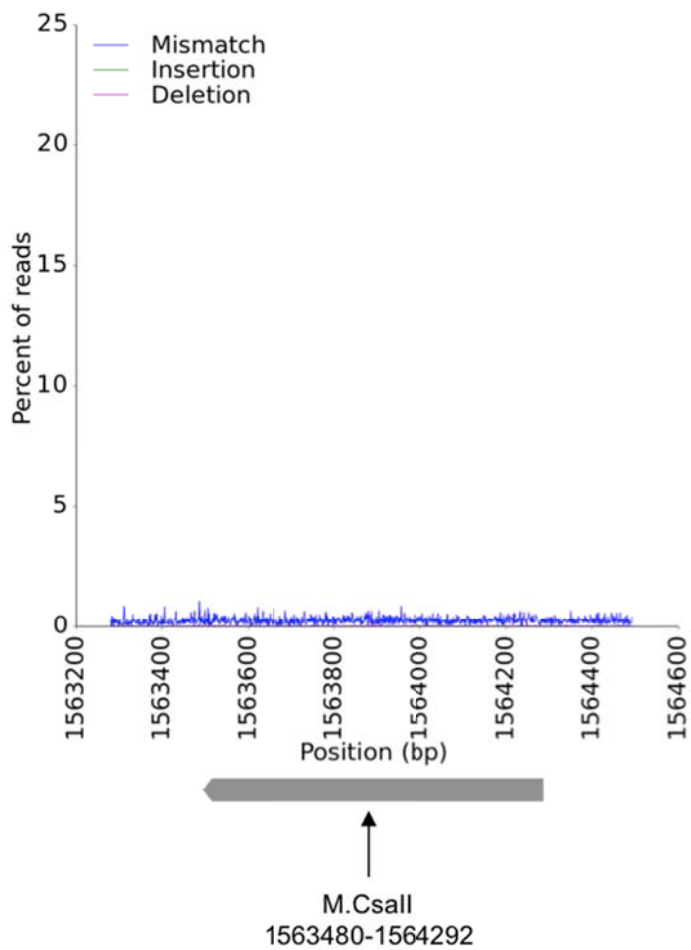

**Supplementary Figure 17:** Read-level MiSeq mismatch and insertion/deletion calls in the coding region ( $\pm 200$ bp) of the 5'-RGATCY-targeting *M.Csall* gene in *C. salexigens*.

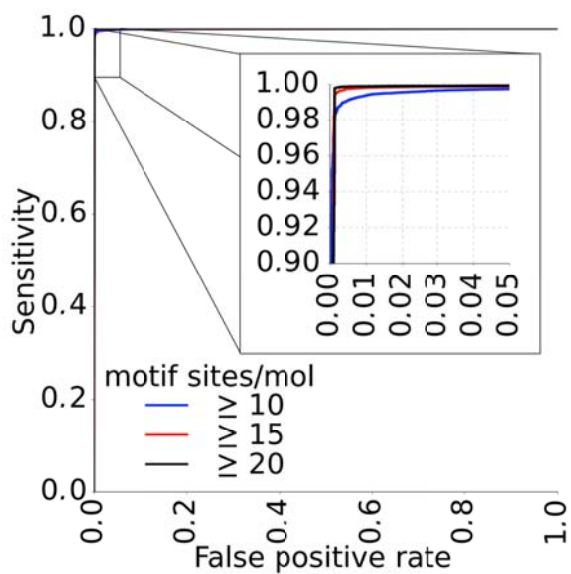

**Supplementary Figure 18:** Sensitivity and specificity of the SM<sub>P</sub> method for detecting molecules that are methylated at the 5'-GATC motif in *H. pylori* J99.

**Supplementary Table 1:** SMRT sequencing statistics.

| Organism                             | Sample type | Library | Reference GenBank accession | Mean insert length | Coverage | Mean read length | Mean subread length |
|--------------------------------------|-------------|---------|-----------------------------|--------------------|----------|------------------|---------------------|
| <i>Escherichia coli</i> O104:H4 C227 |             |         |                             |                    |          |                  |                     |
|                                      | Native      | Short   | CP011331                    | 202                | 402.46   | 5609             | 172                 |
|                                      | WGA         | Short   | CP011331                    | 197                | 97.33    | 6091             | 167                 |
| <i>Chromohalobacter salexigens</i>   |             |         |                             |                    |          |                  |                     |
|                                      | Native      | Short   | NC_007963.1                 | 183                | 78.57    | 8119             | 183                 |
|                                      |             | Long    | NC_007963.1                 | 3357               | 49.13    | 5233             | 3357                |
|                                      | WGA         | Short   | NC_007963.1                 | 180                | 184.76   | 9023             | 180                 |
| <i>Helicobacter pylori</i> J99       |             |         |                             |                    |          |                  |                     |
|                                      | Native      | Short   | NC_000921.1                 | 171                | 71.31    | 4735             | 168                 |
|                                      |             | Long    | CP011330                    | 7304               | 1093.73  | 7965             | 6871                |
|                                      | WGA         | Short   | NC_000921.1                 | 195                | 215.19   | 6873             | 167                 |
|                                      |             | Long    | CP011330                    | 3978               | 390.35   | 4957             | 3978                |

**Supplementary Table 2:** Genome-wide motif counts.

| Organism (reference GenBank accession)           | Motif           | Count |
|--------------------------------------------------|-----------------|-------|
| <i>Escherichia coli</i> O104:H4 C227 (CP011331)  |                 |       |
|                                                  | ACCACC          | 4321  |
|                                                  | CTGCAG          | 2528  |
|                                                  | CCACNNNNNNNTGAY | 478   |
|                                                  | GATC            | 42186 |
|                                                  | RTCANNNNNNNGTGG | 478   |
| <i>Chromohalobacter salexigens</i> (NC_007963.1) |                 |       |
|                                                  | CCACNNNNNNCTC   | 784   |
|                                                  | RGATCY          | 5084  |
|                                                  | GAGNNNNNNGTGG   | 784   |
| <i>Geobacter metallireducens</i> (NC_007517.1)   |                 |       |
|                                                  | GGATC           | 11347 |
|                                                  | TCCAGG          | 5821  |
|                                                  | GATCC           | 11347 |
| <i>Campylobacter jejuni</i> 81-176 (NC_008787.1) |                 |       |
|                                                  | GGRCA           | 1849  |
|                                                  | RAATTY          | 26876 |
|                                                  | CAAYNNNNNNACT   | 309   |
|                                                  | AGTNNNNNRRTTG   | 309   |
|                                                  | TAAYNNNNNTGC    | 460   |

|                                                      |                |       |
|------------------------------------------------------|----------------|-------|
|                                                      | GCANNNNNRRTTA  | 460   |
|                                                      | GCAAGG         | 699   |
| <i>Campylobacter jejuni</i> NCTC 11168 (NC_018521.1) |                |       |
|                                                      | RAATTY         | 27280 |
|                                                      | ACNNNNNCTC     | 1062  |
|                                                      | TAAYNNTGC      | 588   |
|                                                      | GCANNNNNRRTTA  | 469   |
|                                                      | GAGNNNNNGT     | 1062  |
|                                                      | GKAAYG         | 1255  |
| <i>Helicobacter pylori</i> J99 (NC_000921.1)         |                |       |
|                                                      | TCGA           | 674   |
|                                                      | GTAC           | 368   |
|                                                      | GATC           | 10958 |
|                                                      | CATG           | 15120 |
|                                                      | GANTC          | 5516  |
|                                                      | GAGG           | 5001  |
|                                                      | TCNNGA         | 3906  |
|                                                      | GGWCNA         | 1635  |
|                                                      | GWCA Y         | 5101  |
|                                                      | GTSAC          | 210   |
|                                                      | GCCTA          | 3106  |
|                                                      | AAGNNNNNCTC    | 611   |
|                                                      | GAGNNNNNCTT    | 611   |
|                                                      | ATTAAT         | 854   |
|                                                      | AAGNNNNNCTT    | 1582  |
|                                                      | GGWTAA         | 2676  |
|                                                      | AAANNNNNNTGG   | 2211  |
|                                                      | CCANNNNNNTTT   | 2211  |
|                                                      | TCANNNNNNTRG   | 1978  |
|                                                      | CYANNNNNNTGA   | 1978  |
|                                                      | AAGNNNNNNTAAAG | 286   |
|                                                      | CTTTANNNNNNCTT | 286   |
|                                                      | RTAYNNNNNRRTAY | 362   |
| <i>Helicobacter pylori</i> J99 (CP011330)            |                |       |
|                                                      | TCGA           | 690   |
|                                                      | GTAC           | 368   |
|                                                      | GATC           | 11140 |
|                                                      | CATG           | 15336 |
|                                                      | GANTC          | 5588  |
|                                                      | GAGG           | 5120  |
|                                                      | TCNNGA         | 4056  |
|                                                      | GGWCNA         | 1688  |
|                                                      | GWCA Y         | 5263  |
|                                                      | GTSAC          | 208   |

|  |                 |      |
|--|-----------------|------|
|  | GCCTA           | 3214 |
|  | AAGNNNNNNCTC    | 639  |
|  | GAGNNNNNNCTT    | 639  |
|  | ATTAAT          | 862  |
|  | AAGNNNNNNCTT    | 1626 |
|  | GGWTAA          | 2765 |
|  | AAANNNNNNNTGG   | 2256 |
|  | CCANNNNNNNTTT   | 2256 |
|  | TCANNNNNNNTRG   | 2041 |
|  | CYANNNNNNNTGA   | 2041 |
|  | AAGNNNNNNNTAAAG | 303  |
|  | CTTTANNNNNNCTT  | 303  |
|  | RTAYNNNNNNRTAY  | 372  |

**Supplementary Table 3:** Oligonucleotides used in this study.

| Oligonucleotide | Primer sequence (5'=>3')*                                                                                                |
|-----------------|--------------------------------------------------------------------------------------------------------------------------|
| SC-F-XbaI       | GCTCTAGATATAAGCCATTTTCATGCTCC                                                                                            |
| SC-R-XbaI       | GCTCTAGACTCGAGGCGTGATATAGATTGAAAAGTG                                                                                     |
| JHP1365LF-SacII | TCCCCGCGGCGCATGAATTGTCCCGCATAACCATG                                                                                      |
| JHP1365LR-SpeI  | GGACTAGTCCAAACGCCCCCAAAGTGATTGGCC                                                                                        |
| JHP1365RF-SpeI  | GGACTAGTGGCTCAATAGATTGAACTTTATTC                                                                                         |
| JHP1365RR-PstI  | AAACTGCAGGAATGCGTTGTTTAACTGTTTGAAG                                                                                       |
| JHP1411LF-SacII | TCCCCGCGGGTAATTGATCGTGGCTTCATTTTG                                                                                        |
| JHP1411LR-SpeI  | GGACTAGTGGGGGTAGAGGTGAAAATCAAATTC                                                                                        |
| JHP1411RF-SpeI  | GGACTAGTCTTTATTTTGCATCTCTATCCTTT                                                                                         |
| JHP1411RR-PstI  | AAACTGCAGGATGGAGAAAATTAGCGAAGAAATCG                                                                                      |
| Catup           | TGGATGAATTACAAGACT                                                                                                       |
| PGEMTe-seqF     | GCTGGCGAAAGGGGGATGTGCTGCAAG                                                                                              |
| PGEMTe-seqR     | CGCTCGCCGCAGCCGAACGA                                                                                                     |
|                 | * Restriction sites underlined; <i>XbaI</i> (TCTAGA), <i>SacII</i> (CCGCGG), <i>SpeI</i> (ACTAGT), <i>PstI</i> (CTGCAG). |

**Supplementary Table 4:** Plasmids and bacterial strains used.

| Plasmid or strain | Relevant characteristics*                                                                                                                                                                           | Source or reference |
|-------------------|-----------------------------------------------------------------------------------------------------------------------------------------------------------------------------------------------------|---------------------|
| pGEM-T easy       | Vector to construct gene mutations, Ap <sup>R</sup>                                                                                                                                                 | Promega             |
| pXZ032            | pGEM-T easy, carrying <i>sacB-cat</i> cassette, Ap <sup>R</sup> , Cm <sup>R</sup>                                                                                                                   | REF 64              |
| pXZ577            | pGEM-T easy, <i>jhp1365</i> upstream flanking region directly fused with <i>jhp1365</i> downstream flanking region, Ap <sup>R</sup>                                                                 | This work           |
| pXZ578            | pXZ577, <i>sacB-cat</i> cassette inserted between <i>jhp1365</i> upstream and downstream flanking region to construct $\Delta$ <i>jhp1365::sacB-cat</i> mutation, Ap <sup>R</sup> , Cm <sup>R</sup> | This work           |
| pXZ579            | pGEM-T easy, <i>jhp1411</i> upstream flanking region directly fused with <i>jhp1411</i> downstream flanking region, Ap <sup>R</sup>                                                                 | This work           |
| pXZ580            | pXZ579, <i>sacB-cat</i> cassette inserted between <i>jhp1411</i> upstream and downstream flanking region to construct $\Delta$ <i>jhp1411::sacB-cat</i> mutation, Ap <sup>R</sup> , Cm <sup>R</sup> | This work           |
| <i>E. coli</i>    |                                                                                                                                                                                                     |                     |

|                  |                                                                                                                  |            |
|------------------|------------------------------------------------------------------------------------------------------------------|------------|
| XL1-blue         | Host for cloning plasmid                                                                                         | Stratagene |
| <i>H. pylori</i> |                                                                                                                  |            |
| J99              | USA-origin isolate                                                                                               | REF 53     |
| HPXZ1398         | J99 $\Delta$ <i>jhp1365::sacB-cat</i>                                                                            | This work  |
| HPXZ1401         | J99 $\Delta$ <i>jhp1411::sacB-cat</i>                                                                            | This work  |
|                  | *Ap <sup>R</sup> and Cm <sup>R</sup> represent ampicillin-resistant and chloramphenicol-resistant, respectively. |            |

**Supplementary Table 5:** Differentially expressed genes (FDR < 0.05) in HPXZ1401 vs. HPXZ1383-1387. Start/End positions listed for the *H. pylori* J99 HGAP reference assembly.

| Induced gene list                         |              |         |         |        |                                                      |                              |          |          |                                             |                                   |                                               |
|-------------------------------------------|--------------|---------|---------|--------|------------------------------------------------------|------------------------------|----------|----------|---------------------------------------------|-----------------------------------|-----------------------------------------------|
| ORF                                       | Gene         | Start   | End     | Strand | Description                                          | log2 fold change (KO vs. WT) | p value  | FDR      | Distance to 5 nearest upstream GWCA Y sites | GWCA Y positions in coding region | Distance to 5 nearest downstream GWCA Y sites |
| <i>Flagellum related</i>                  |              |         |         |        |                                                      |                              |          |          |                                             |                                   |                                               |
| jhp0688                                   | <i>flaG</i>  | 768725  | 769084  | +      | flagellar protein FlaG                               | 3.44                         | 7.58E-04 | 4.10E-02 | -760,-1222,-1300,-2697,-3106,-3673          |                                   | +856,+1282,+1531,+1549,+1840,+2088            |
| jhp0804                                   | <i>flgE</i>  | 881778  | 883934  | -      | flagellar hook protein FlgE                          | 4.12                         | 1.50E-10 | 2.19E-07 | -283,-381,-652,-2028,-2958,-2973            | 883237,883141,82916,882643        | +252,+357,+462,+684,+1326,+1544               |
| jhp1467                                   | <i>flgB</i>  | 1617081 | 1617503 | -      | flagellar basal-body rod protein FlgB                | 2.81                         | 1.51E-05 | 2.01E-03 | -205,-623,-1704,-1767,-2154,-2919           | 1617193                           | +819,+1295,+2588,+3637,+4282,+4331            |
| <i>chaperone</i>                          |              |         |         |        |                                                      |                              |          |          |                                             |                                   |                                               |
| jhp0008                                   | <i>groEL</i> | 7758    | 9398    | -      | molecular chaperone GroEL                            | 2.32                         | 4.20E-04 | 2.83E-02 | -43,-94,-128,-955,-2114,-3797               | 8704,8641,8527,8500,7945          | +461,+665,+738,+1393,+3215,+3302              |
| jhp0009                                   | <i>groES</i> | 9423    | 9779    | -      | co-chaperonin GroES                                  | 3.58                         | 7.99E-09 | 2.34E-06 | -574,-1733,-3416,-3911,-4080,-5505          | 9526,9492,9441                    | +719,+782,+896,+923,+1478,+2126               |
| jhp0102                                   | <i>grpE</i>  | 114404  | 114979  | -      | heat shock protein GrpE                              | 3.20                         | 9.98E-04 | 4.55E-02 | -175,-430,-1244,-1457,-1715,-1779           |                                   | +2312,+3723,+4146,+4347,+5116,+5655           |
| jhp0103                                   | <i>hrcA</i>  | 114979  | 115779  | -      | heat-inducible transcription repressor               | 3.11                         | 1.04E-06 | 1.69E-04 | -444,-657,-915,-979,-1786,-2410             | 115409,115154                     | +2887,+4298,+4721,+4922,+5691,+6230           |
| <i>DNA processing</i>                     |              |         |         |        |                                                      |                              |          |          |                                             |                                   |                                               |
| jhp1266                                   | <i>ung</i>   | 1383952 | 1384653 | -      | uracil-DNA glycosylase                               | 2.61                         | 1.08E-03 | 4.55E-02 | -103,-472,-517,-1058,-1352,-1745            |                                   | +327,+441,+648,+1056,+1226,+1934              |
| <i>Metabolism, transporter, and other</i> |              |         |         |        |                                                      |                              |          |          |                                             |                                   |                                               |
| jhp0099                                   | <i>cysK</i>  | 110644  | 111561  | -      | cysteine synthase                                    | 2.37                         | 1.08E-03 | 4.55E-02 | -531,-3593,-3848,-4662,-4875,-5133          | 110681                            | +386,+587,+1356,+1895,+2114,+2414             |
| jhp0126                                   |              | 140867  | 142312  | -      | predicted iron-sulfur protein                        | 2.35                         | 9.36E-04 | 4.55E-02 | -155,-168,-637,-998,-1744,-2677             | 142215,140916                     | +567,+618,+1908,+3093,+3509,+4000             |
| jhp0545                                   | <i>bioF</i>  | 593501  | 594622  | -      | 8-amino-7-oxononanoate synthase                      | 3.82                         | 4.25E-09 | 1.55E-06 | -162,-324,-744,-828,-3459,-3473             | 594315,593901,593838,593565       | +262,+304,+1372,+2089,+2227,+5699             |
| jhp0560                                   | <i>aspS</i>  | 621872  | 623611  | +      | aspartyl-tRNA synthetase                             | 2.23                         | 9.97E-04 | 4.55E-02 | -248,-965,-3689,-4280,-6431,-10466          | 621881,622168,623242              | +1163,+1672,+2082,+2829,+4577,+4841           |
| jhp0627                                   | <i>feoB</i>  | 697655  | 699583  | -      | ferrous iron transport protein B                     | 2.55                         | 1.24E-03 | 4.73E-02 | -661,-1320,-1374,-1574,-2572,-3274          | 699264                            | +147,+294,+1202,+1250,+2150,+2201             |
| jhp0640                                   | <i>dggA</i>  | 714369  | 714755  | +      | diacylglycerol kinase                                | 2.25                         | 5.07E-04 | 3.16E-02 | -1047,-1517,-1721,-1775,-2643,-4883         | 714491,714671                     | +13,+273,+450,+480,+2136,+2241                |
| jhp0653                                   |              | 731774  | 732496  | -      | ABC transporter ATP-binding protein                  | 2.88                         | 1.11E-04 | 1.19E-02 | -269,-562,-2204,-3273,-3813,-3970           | 731973                            | +4,+658,+2289,+3086,+4094,+4266               |
| jhp0935                                   |              | 1037343 | 1037885 | -      | Predicted partitioning protein A                     | 2.48                         | 5.20E-04 | 3.16E-02 | -358,-1548,-1560,-1745,-2081,-2402          | 1037671,1037593,1037437           | +287,+456,+858,+960,+2009,+2513               |
| jhp1093                                   | <i>pgi</i>   | 1211430 | 1213067 | +      | glucose-6-phosphate isomerase                        | 2.44                         | 1.69E-04 | 1.64E-02 | -550,-4094,-4303,-4746,-4864,-5609          | 1212530,1212911                   | +189,+683,+1233,+1284,+2965,+3649             |
| jhp1324                                   | <i>kpsF</i>  | 1453242 | 1454231 | +      | Predicted polysialic acid capsule expression protein | 3.34                         | 6.54E-08 | 1.59E-05 | -1,-299,-671,-860,-1580,-6136               |                                   | +116,+2023,+2377,+2780,+4027,+5490            |



| Unknown function |  |         |         |   |                                                           |      |          |          |                                     |         |                                     |
|------------------|--|---------|---------|---|-----------------------------------------------------------|------|----------|----------|-------------------------------------|---------|-------------------------------------|
| jhp0143          |  | 158730  | 159005  | + | hypothetical protein                                      | 3.45 | 3.50E-04 | 2.64E-02 | -1477,-1540,-2436,-2880,-3099,-5118 |         | +439,+1142,+1652,+1757,+2140,+2225  |
| jhp0153          |  | 168125  | 168598  | - | hypothetical protein                                      | 4.10 | 1.09E-03 | 4.55E-02 | -455,-844,-1253,-1717,-1753,-2285   |         | +301,+1212,+2564,+3560,+4873,+5098  |
| jhp0619          |  | 687381  | 688148  | - | hypothetical protein, predicted integral membrane protein | 3.21 | 7.49E-05 | 9.12E-03 | -495,-606,-669,-1735,-1963,-3289    | 687769  | +80,+383,+1085,+1671,+3068,+3616    |
| jhp0654          |  | 732509  | 732910  | - | hypothetical protein                                      | 3.78 | 1.14E-04 | 1.19E-02 | -148,-1790,-2859,-3399,-3556,-3568  | 732765  | +536,+739,+1393,+3024,+3821,+4829   |
| jhp0986          |  | 1096410 | 1097078 | + | hypothetical protein                                      | 4.15 | 1.77E-09 | 1.29E-06 | -125,-317,-368,-662,-746,-1525      |         | +1043,+1283,+2074,+3631,+4488,+6066 |
| jhp0987          |  | 1097080 | 1097838 | + | hypothetical protein                                      | 4.01 | 3.77E-09 | 1.55E-06 | -795,-987,-1038,-1332,-1416,-2195   |         | +283,+523,+1314,+2871,+3728,+5306   |
| jhp1163          |  | 1295719 | 1295949 | + | hypothetical protein                                      | 2.71 | 1.49E-05 | 2.01E-03 | -201,-345,-1278,-3697,-3816,-4813   | 1295814 | +9,+1955,+2801,+3108,+3817,+8756    |
| jhp1319          |  | 1448519 | 1449139 | + | hypothetical protein                                      | 3.68 | 6.59E-07 | 1.20E-04 | -1413,-2232,-2296,-2434,-4834,-5522 |         | +2523,+3243,+3432,+3804,+4102,+5208 |

**Repressed gene list**

| ORF                     | Gene          | Start   | End     | Strand | Description                        | log2 fold change (KO vs. WT) | p value  | FDR      | Distance to 5 nearest upstream GWCA Y sites | GWCA Y positions in coding region  | Distance to 5 nearest downstream GWCA Y sites |
|-------------------------|---------------|---------|---------|--------|------------------------------------|------------------------------|----------|----------|---------------------------------------------|------------------------------------|-----------------------------------------------|
| <i>DNA processing</i>   |               |         |         |        |                                    |                              |          |          |                                             |                                    |                                               |
| jhp0811                 | <i>ruvC</i>   | 891084  | 891557  | -      | Holliday junction resolvase        | -3.29                        | 6.46E-04 | 3.63E-02 | -1343,-1516,-1810,-2115,-3739,-4861         | 891443                             | +98,+1016,+1534,+1629,+2914,+3184             |
| jhp0826                 | <i>tmpB</i>   | 908966  | 910294  | -      | IS606 transposase                  | -3.62                        | 1.20E-03 | 4.73E-02 | -575,-1442,-1774,-3148,-3295,-3688          | 909750,909627,909585,909401,909060 | +403,+1497,+1918,+3654,+3735,+4531            |
| jhp0931                 | <i>topA_3</i> | 1032846 | 1034906 | +      | topoisomerase I                    | -4.33                        | 4.25E-04 | 2.83E-02 | -503,-935,-2639,-3263,-3578,-3905           | 1032860                            | +590,+675,+758,+1445,+1583,+1607              |
| <i>Metabolism</i>       |               |         |         |        |                                    |                              |          |          |                                             |                                    |                                               |
| jhp0006                 | <i>panC</i>   | 3235    | 4065    | +      | pantoate--beta-alanine ligase      | -5.29                        | 1.80E-04 | 1.65E-02 | -438,-444                                   | 3735                               | +89,+306,+631,+1733,+2587,+2717               |
| jhp0709                 | <i>amiA</i>   | 786502  | 787911  | -      | N-acetylmuramoyl-L-alanine amidase | -4.14                        | 1.26E-03 | 4.73E-02 | -410,-3136,-3394,-4384,-4735,-5095          | 787533,787097,787016               | +1020,+1141,+1149,+1276,+1617,+2204           |
| jhp0968                 | <i>cfa</i>    | 1072958 | 1074127 | +      | cyclopropane fatty acid synthase   | -3.45                        | 1.17E-03 | 4.73E-02 | -211,-3983,-4061,-4442,-7279,-7375          | 1073107,1073119,1073377,1073926    | +1038,+1359,+2211,+3337,+3515,+4177           |
| jhp1023                 |               | 1134753 | 1135505 | +      | short chain alcohol dehydrogenase  | -3.78                        | 8.19E-04 | 4.28E-02 | -102,-249,-906,-1281,-3269,-4847            | 1135058,1135067,1135388            | +745,+785,+1071,+3399,+4852,+4868             |
| <i>Unknown function</i> |               |         |         |        |                                    |                              |          |          |                                             |                                    |                                               |
| jhp0869                 |               | 961971  | 962456  | +      | hypothetical protein               | -3.49                        | 5.73E-04 | 3.35E-02 | -2593,-2908,-5249,-5567,-5588,-7961         |                                    | +18,+352,+402,+2685,+5238,+5282               |
| jhp0927                 |               | 1023777 | 1025174 | +      | hypothetical protein               | -4.97                        | 3.61E-04 | 2.64E-02 | -2612,-2774,-4635,-7078,-8448,-8651         | 1024973                            | +451,+1361,+1937,+2258,+2357,+2489            |
| jhp0933                 |               | 1035401 | 1036204 | +      | hypothetical protein               | -5.22                        | 2.91E-04 | 2.36E-02 | -2541,-3058,-3490,-5194,-5818,-6133         | 1035496,1035581,1035664            | +147,+285,+309,+1926,+2043,+2214              |
| jhp0934                 |               | 1036277 | 1037296 | -      | hypothetical protein               | -5.23                        | 2.37E-04 | 2.04E-02 | -141,-297,-375,-947,-2137,-2149             | 1037056,1036887,1036485,1036383    | +943,+1447,+2074,+2272,+3283,+5291            |
| jhp1397                 |               | 1528923 | 1529639 | -      | hypothetical protein               | -4.19                        | 8.57E-04 | 4.32E-02 | -379,-552,-1642,-1657,-2224,-2372           | 1529518,1529158                    | +1394,+1892,+3425,+3611,+3638,+3821           |

**Supplementary Table 6:** Differentially expressed genes (FDR<0.05) in HPXZ1398 vs. HPXZ1383-1387. Start/End positions listed for the *H. pylori* J99 HGAP reference assembly.

| Induced gene list |      |       |     |        |             |                              |         |     |                                |                                         |                                  |
|-------------------|------|-------|-----|--------|-------------|------------------------------|---------|-----|--------------------------------|-----------------------------------------|----------------------------------|
| ORF               | Gene | Start | End | Strand | Description | log2 fold change (KO vs. WT) | p value | FDR | Distance to 5 nearest upstream | TCANNNNNT RG positions in coding region | Distance to 5 nearest downstream |

|                                           |               |         |         |   |                                                            | WT)  |          |          | TCANNNNN<br>NTRG sites                |                      | TCANNNNN<br>TRG sites                   |
|-------------------------------------------|---------------|---------|---------|---|------------------------------------------------------------|------|----------|----------|---------------------------------------|----------------------|-----------------------------------------|
| <i>Flagellum related</i>                  |               |         |         |   |                                                            |      |          |          |                                       |                      |                                         |
| jhp0804                                   | <i>flgE</i>   | 881778  | 883934  | - | flagellar hook protein FlgE                                | 3.58 | 1.60E-08 | 3.58E-06 | -716,-4949,-5395,-5582,-7217,-7442    | 883641               | +5645,+6839,+8596,+12802,+15209,+16300  |
| <i>DNA processing</i>                     |               |         |         |   |                                                            |      |          |          |                                       |                      |                                         |
| jhp0785                                   | <i>hsdS_2</i> | 864828  | 865451  | - | type I restriction enzyme S genes                          | 2.29 | 7.13E-04 | 3.24E-02 | -27,-1118,-3525,-7731,-9488,-10682    |                      | +219,+2264,+2678,+4138,+4882,+5035      |
| jhp1438                                   | <i>dnaQ</i>   | 1585662 | 1586633 | - | DNA polymerase III subunit epsilon                         | 2.05 | 9.45E-04 | 3.73E-02 | -3035,-5289,-6320,-6641,-9129,-10817  |                      | +1409,+2225,+3402,+5547,+5672,+7655     |
| <i>Metabolism, transporter, and other</i> |               |         |         |   |                                                            |      |          |          |                                       |                      |                                         |
| jhp0099                                   | <i>cysK</i>   | 110644  | 111561  | - | cysteine synthase                                          | 2.46 | 5.38E-04 | 2.77E-02 | -4253,-5073,-7195,-7494,-7934,-8655   |                      | +476,+524,+7472,+9656,+10355,+14846     |
| jhp0180                                   | <i>tpiA</i>   | 197063  | 197767  | + | triosephosphate isomerase                                  | 2.47 | 3.57E-04 | 2.39E-02 | -314,-1676,-5803,-6909,-9529,-12558   |                      | +5093,+7708,+8011,+8479,+10368,+11124   |
| jhp0200                                   |               | 218958  | 220604  | + | solute carrier family 13, sodium-dependent transporter     | 1.98 | 1.42E-03 | 4.75E-02 | -542,-1145,-3057,-6644,-9385,-10067   | 219252,220110,220277 | +264,+6024,+7786,+13763,+14906,+16129   |
| jhp0342                                   | <i>hofB</i>   | 373015  | 374454  | + | Predicted outer membrane transport protein HofB            | 2.05 | 6.78E-04 | 3.24E-02 | -1463,-3134,-4367,-5359,-7869,-9957   |                      | +588,+2912,+3117,+4547,+5789,+6052      |
| jhp0384                                   | <i>rpsO</i>   | 413760  | 414032  | + | 30S ribosomal protein S15                                  | 2.20 | 9.23E-04 | 3.73E-02 | -432,-468,-8669,-14040,-14292,-16763  |                      | +742,+1883,+776,+12049,+12264,+14570    |
| jhp0423                                   | <i>kefB</i>   | 455743  | 456993  | - | glutathione-regulated potassium-efflux system protein      | 2.19 | 1.51E-03 | 4.83E-02 | -65,-566,-1896,-2307,-3479,-4655      | 456167               | +1201,+4679,+9634,+12305,+14494,+16389  |
| jhp0545                                   | <i>bioF</i>   | 593501  | 594622  | - | 8-amino-7-oxononanoate synthase                            | 4.19 | 7.70E-11 | 1.03E-07 | -5066,-5270,-5417,-6375,-6673,-9424   | 594156               | +589,+3799,+7199,+8273,+8461,+10730     |
| jhp0724                                   | <i>lolC</i>   | 804721  | 805953  | + | Predicted lipoprotein release system transmembrane protein | 2.48 | 6.71E-05 | 7.64E-03 | -2504,-2630,-4877,-5359,-13684,-13951 | 805233,805707,805854 | +2196,+2641,+13328,+13798,+15155,+15573 |
| jhp0769                                   | <i>gatA</i>   | 846840  | 848201  | - | aspartyl/glutamyl-tRNA amidotransferase subunit A          | 2.13 | 9.21E-04 | 3.73E-02 | -1480,-2409,-3571,-3983,-5046,-5386   | 847084               | +4851,+6863,+7028,+9870,+12971,+16468   |
| jhp0781                                   | <i>thiE</i>   | 859321  | 859974  | - | thiamine-phosphate pyrophosphorylase                       | 3.09 | 5.92E-05 | 7.64E-03 | -716,-2176,-2590,-4635,-5504,-6595    | 859946,859793,859610 | +4640,+5262,+5734,+6074,+7137,+7549     |
| jhp0841                                   | <i>pta</i>    | 920263  | 921822  | - | phosphotransacetylase                                      | 2.00 | 1.15E-03 | 4.16E-02 | -761,-2049,-3333,-4700,-5891,-7363    | 921536               | +1609,+1835,+8654,+9097,+12275,+14594   |
| jhp0980                                   | <i>aroA</i>   | 1088513 | 1089802 | + | 3-phosphoshikimate 1-carboxyvinyltransferase               | 2.29 | 3.91E-04 | 2.39E-02 | -4494,-5359,-6435,-8215,-8874,-8955   | 1089535              | +112,+400,+1427,+2358,+2441,+3054       |
| jhp1324                                   | <i>kpsF</i>   | 1453242 | 1454231 | + | Predicted polysialic acid capsule expression protein       | 3.61 | 3.78E-09 | 1.61E-06 | -1625,-2791,-7288,-7657,-8766,-9353   |                      | +7193,+7902,+10051,+11292,+12286,+12705 |
| <i>Unknown function</i>                   |               |         |         |   |                                                            |      |          |          |                                       |                      |                                         |
| jhp0355                                   |               | 386564  | 386824  | - | hypothetical protein                                       | 3.58 | 1.60E-08 | 3.58E-06 | -967,-2530,-4358,-5278,-14608,-15431  |                      | +1103,+1210,+2246,+2420,+9227,+10399    |
| jhp0440                                   |               | 475860  | 478598  | + | hypothetical protein                                       | 2.50 | 1.67E-04 | 1.31E-02 | -1305,-2752,-4237,-7338,-8832,-9195   | 477137               | +944,+1541,+4108,+4988,+7793,+13259     |
| jhp0555                                   |               | 607216  | 607785  | + | hypothetical protein                                       | 2.45 | 4.01E-04 | 2.39E-02 | -336,-920,-1950,-2186,-2589,-6885     |                      | +1705,+1906,+7473,+8500,+19576,+20337   |
| jhp0619                                   |               | 687381  | 688148  | - | hypothetical protein, predicted integral membrane protein  | 3.04 | 3.53E-04 | 2.39E-02 | -1936,-3088,-7106,-8451,-9595,-10750  |                      | +3713,+4129,+6139,+6225,+8131,+8552     |

| jhp0687                     |                  | 767426  | 768628  | +      | hypothetical protein                                       | 2.79                         | 4.57E-06 | 7.66E-04 | -767,-3485,-7607,-7961,-12266,-14704               | 768196                                                  | +112,+3641,+5859,+6186,+8033,+9336                   |  |
|-----------------------------|------------------|---------|---------|--------|------------------------------------------------------------|------------------------------|----------|----------|----------------------------------------------------|---------------------------------------------------------|------------------------------------------------------|--|
| jhp0986                     |                  | 1096410 | 1097078 | +      | hypothetical protein                                       | 4.12                         | 2.02E-09 | 1.36E-06 | -317,-368,-1409,-1658,-1973,-3335                  | 1096445,1096493                                         | +3565,+3581,+3634,+3895,+4519,+6294                  |  |
| jhp0987                     |                  | 1097080 | 1097838 | +      | hypothetical protein                                       | 4.00                         | 4.79E-09 | 1.61E-06 | -587,-635,-987,-1038,-2079,-2328                   |                                                         | +2805,+2821,+2874,+3135,+3759,+5534                  |  |
| jhp1044                     |                  | 1157436 | 1160900 | -      | hypothetical protein                                       | 2.65                         | 7.98E-05 | 7.64E-03 | -762,-1554,-2466,-4624,-8164,-12590                | 1159381,1157580                                         | +2079,+2700,+4012,+5812,+6840,+7792                  |  |
| jhp1319                     |                  | 1448519 | 1449139 | +      | hypothetical protein                                       | 3.67                         | 7.46E-07 | 1.43E-04 | -2565,-2934,-4043,-4630,-5517,-7955                |                                                         | +1312,+2478,+12285,+12994,+15143,+16384              |  |
| <b>Repressed gene list</b>  |                  |         |         |        |                                                            |                              |          |          |                                                    |                                                         |                                                      |  |
| ORF                         | Gene             | Start   | End     | Strand | Description                                                | log2 fold change (KO vs. WT) | p value  | FDR      | Distance to 5 nearest upstream TCANNNNN NTRG sites | TCANNNNNNT RG positions in coding region                | Distance to 5 nearest downstream TCANNNNNN TRG sites |  |
| <i>DNA processing</i>       |                  |         |         |        |                                                            |                              |          |          |                                                    |                                                         |                                                      |  |
| jhp0629                     | <i>hpy991 VM</i> | 700587  | 701801  | +      | type II DNA modification enzyme                            | -3.76                        | 6.92E-04 | 3.24E-02 | -1603,-4178,-4573,-6132,-7322,-10700               |                                                         | +1724,+3952,+6651,+7152,+8997,+9063                  |  |
| jhp0931                     | <i>topA_3</i>    | 1032846 | 1034906 | +      | topoisomerase I                                            | -4.37                        | 4.27E-04 | 2.39E-02 | -786,-2443,-2477,-2918,-4814,-5333                 | 1033118,1034267                                         | +273,+686,+4793,+5491,+7331,+7675                    |  |
| jhp1166                     | <i>ssb</i>       | 1299583 | 1300128 | -      | single-stranded DNA-binding protein                        | -3.45                        | 7.24E-04 | 3.24E-02 | -1496,-3340,-5076,-13422,-14199,-23258             |                                                         | +1244,+3776,+6511,+7429,+9805,+10132                 |  |
| <i>Metabolism and other</i> |                  |         |         |        |                                                            |                              |          |          |                                                    |                                                         |                                                      |  |
| jhp0135                     | <i>fixP</i>      | 151681  | 152559  | +      | cytochrome oxidase (CBB3-type)                             | -5.94                        | 5.30E-04 | 2.77E-02 | -1215,-1452,-2531,-14240,-15086,-15664             |                                                         | +222,+2197,+2668,+3484,+5398,+5494                   |  |
| jhp0709                     | <i>amiA</i>      | 786502  | 787911  | -      | N-acetylmuramoyl-L-alanine amidase                         | -4.13                        | 1.26E-03 | 4.44E-02 | -2265,-3121,-3217,-3575,-5281,-5530                |                                                         | +2915,+3260,+4221,+5725,+7702,+7780                  |  |
| jhp0909                     | <i>gatC</i>      | 1005692 | 1005973 | +      | aspartylglutamyl-tRNA amidotransferase subunit C           | -5.90                        | 2.31E-05 | 3.44E-03 | -1709,-3568,-5496,-6403,-8742,-9127                |                                                         | +1927,+2881,+4107,+7179,+9308,+10211                 |  |
| jhp0968                     | <i>cfa</i>       | 1072958 | 1074127 | +      | cyclopropanoic fatty acid synthase                         | -4.44                        | 8.58E-05 | 7.68E-03 | -831,-5025,-5375,-5970,-9402,-12694                |                                                         | +1243,+1651,+3224,+4108,+5280,+5431                  |  |
| jhp1039                     | <i>purB</i>      | 1151605 | 1152927 | +      | adenylosuccinate lyase                                     | -5.59                        | 1.26E-04 | 1.06E-02 | -516,-1833,-9063,-10604,-10928,-11430              |                                                         | +2842,+3478,+4189,+5361,+10450,+12079                |  |
| jhp1437                     | <i>hcpG</i>      | 1584853 | 1585623 | +      | Cysteine-rich protein G, related to amoxicillin resistance | -5.93                        | 4.23E-04 | 2.39E-02 | -1417,-2106,-2856,-4834,-5409,-5476                |                                                         | +141,+1185,+1657,+3199,+5793,+6378                   |  |
| <i>Unknown function</i>     |                  |         |         |        |                                                            |                              |          |          |                                                    |                                                         |                                                      |  |
| jhp0093                     |                  | 103627  | 104388  | +      | hypothetical protein                                       | -4.19                        | 1.47E-03 | 4.80E-02 | -2421,-2985,-4215,-4909,-13452,-14022              |                                                         | +848,+1124,+1930,+3141,+6601,+8226                   |  |
| jhp0360                     |                  | 391140  | 391547  | -      | hypothetical protein                                       | -4.33                        | 1.03E-03 | 3.85E-02 | -555,-9885,-10708,-12948,-15620,-17594             | 391182                                                  | +1786,+3349,+5679,+5786,+6822,+6996                  |  |
| jhp0816                     |                  | 894929  | 896773  | -      | hypothetical protein                                       | -5.23                        | 2.37E-04 | 1.77E-02 | -2272,-2625,-3799,-3895,-6010,-6049                | 895374,895125                                           | +259,+3553,+3778,+5413,+5600,+6046                   |  |
| jhp0928                     |                  | 1025324 | 1032019 | +      | hypothetical protein                                       | -4.13                        | 1.31E-03 | 4.52E-02 | -2870,-8112,-8769,-9140,-10043,-12172              | 1025645,1026292,1027513,1028032,1029928,1030369,1030403 | +41,+1099,+2248,+3160,+3573,+7680                    |  |
| jhp0934                     |                  | 1036277 | 1037296 | -      | hypothetical protein                                       | -4.55                        | 9.83E-04 | 3.77E-02 | -1609,-2816,-4140,-5659,-7214,-8098                |                                                         | +2386,+6192,+7488,+7973,+8444,+8492                  |  |
| jhp1070                     |                  | 1183290 | 1185569 | -      | hypothetical protein                                       | -5.12                        | 7.92E-05 | 7.64E-03 | -1161,-1950,-2188,-3085,-3729,-6379                |                                                         | +1337,+1595,+5254,+6642,+8389,+9800                  |  |
| jhp1113                     |                  | 1237715 | 1238866 | -      | hypothetical protein                                       | -4.39                        | 9.10E-04 | 3.73E-02 | -775,-2692,-4531,-4882,-4979,-6467                 |                                                         | +599,+2655,+3012,+3823,+4366,+4510                   |  |
